# Supplementary material for: Exosomal tRF-Leu-AAG-001 derived from mast cell as a potential non-invasive diagnostic biomarker for endometriosis
Source: PubMed Central journal article supplement (PMC9233364; doi:10.1186/s12905-022-01827-6), 2022-06-25

## **Supplementary figures**

**Figure 1S(C)** | The original images of exosomal marker protein HSP70.

**HSP70**

EVs from Tissue

NE EMs

70kDa→

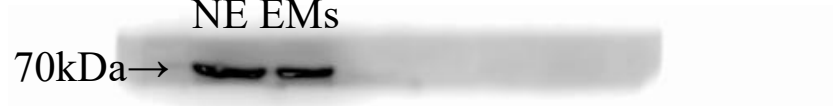

EVs from Leucorrhoea

NC EMs

70kDa→

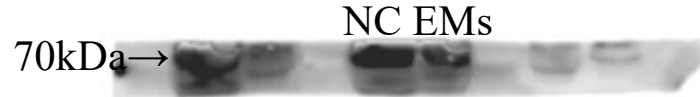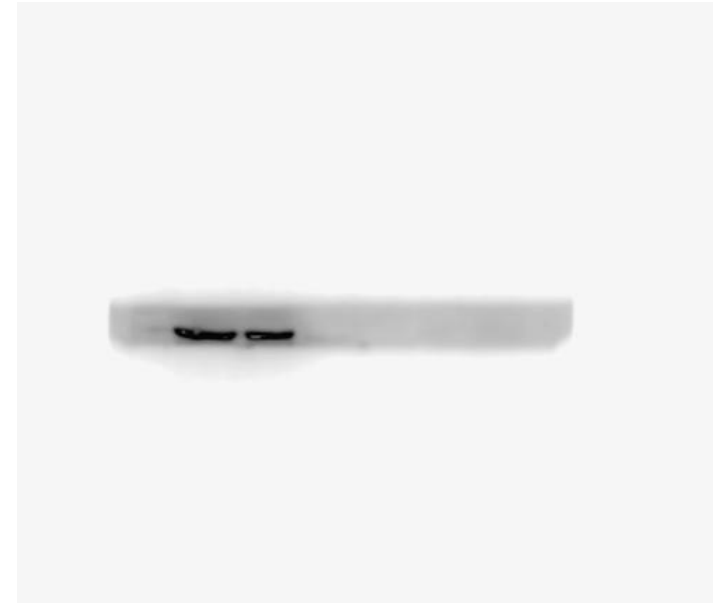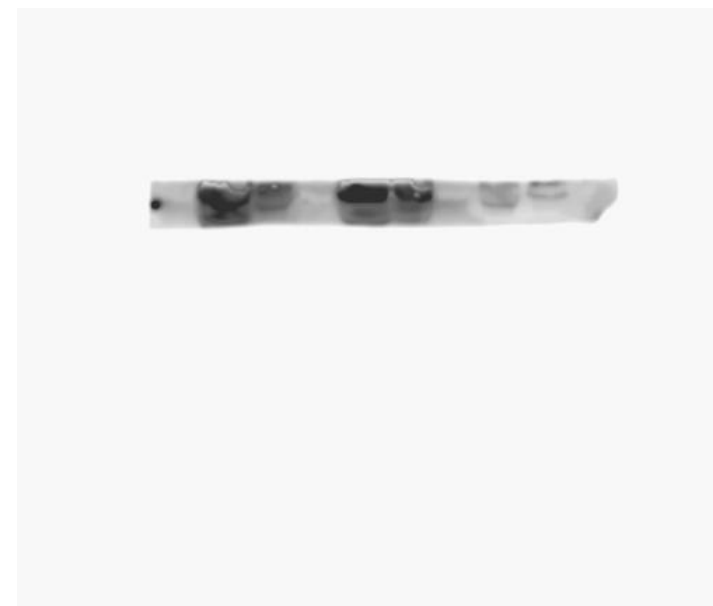

**Figure 1S(C)** | The original images of exosomal marker protein Flotillin1.

**Flotillin1**

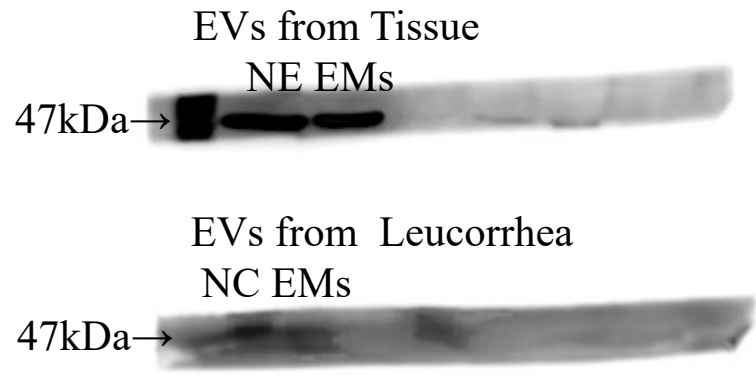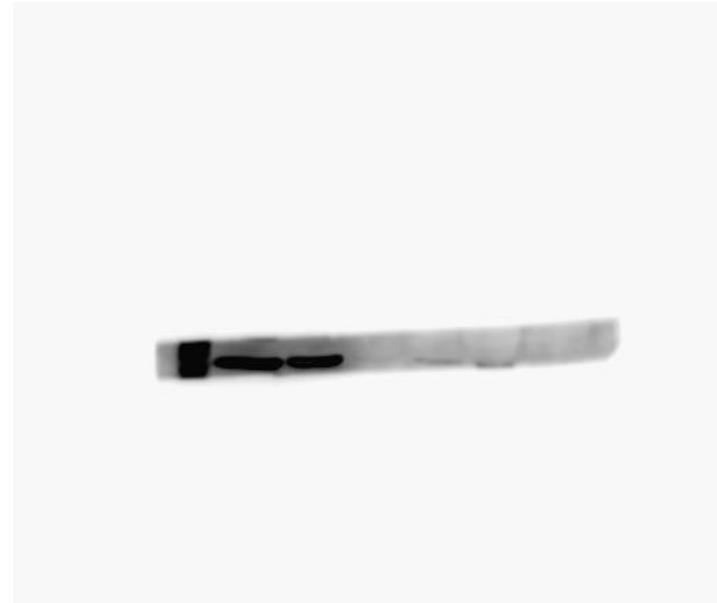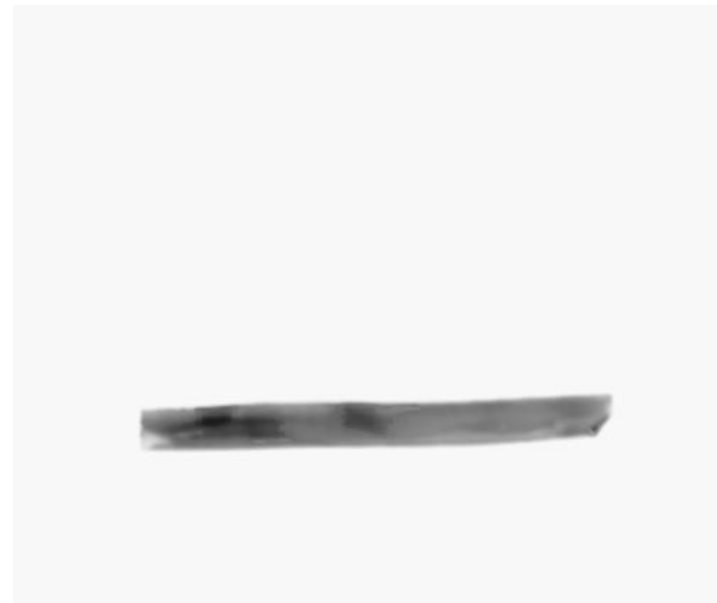

**Figure 1S(C)** | The original images of exosomal marker protein CD63 and Calnexin.

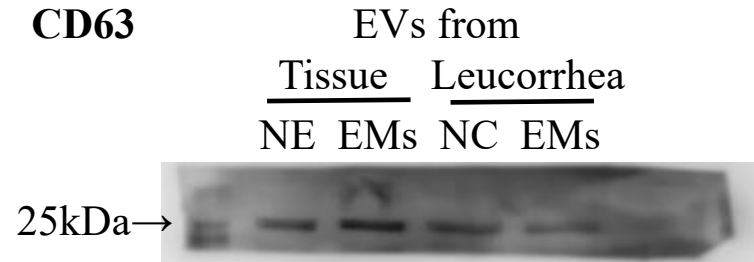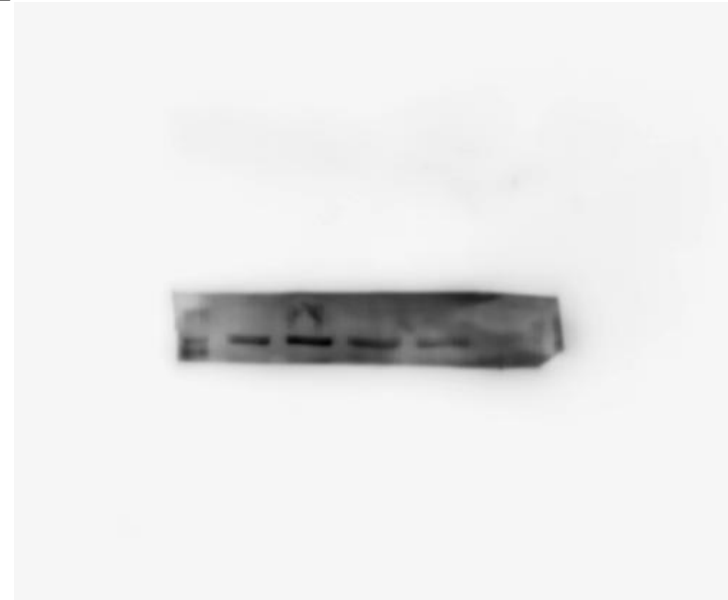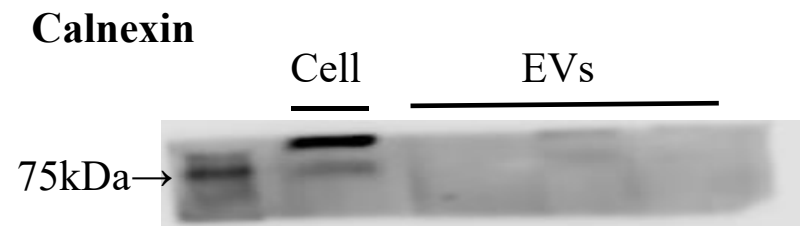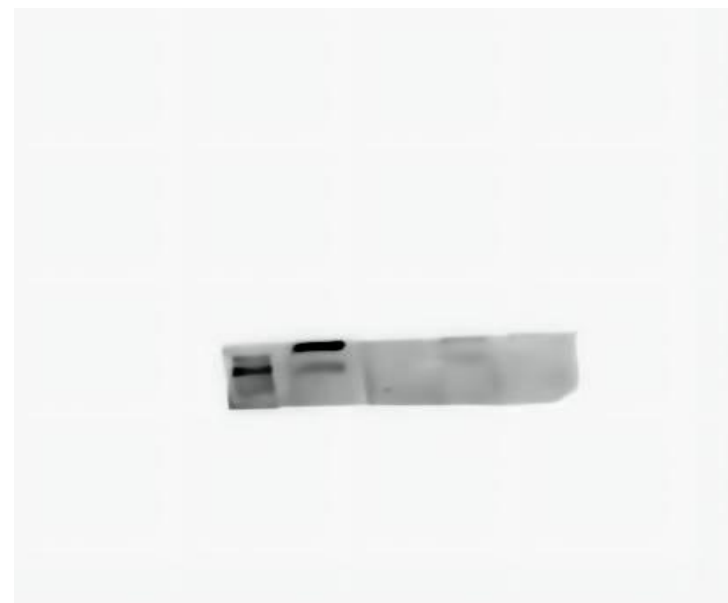

**Figure 3S(A)** | The expression of tRF (left) and U6 (right) in ectopic tissues.

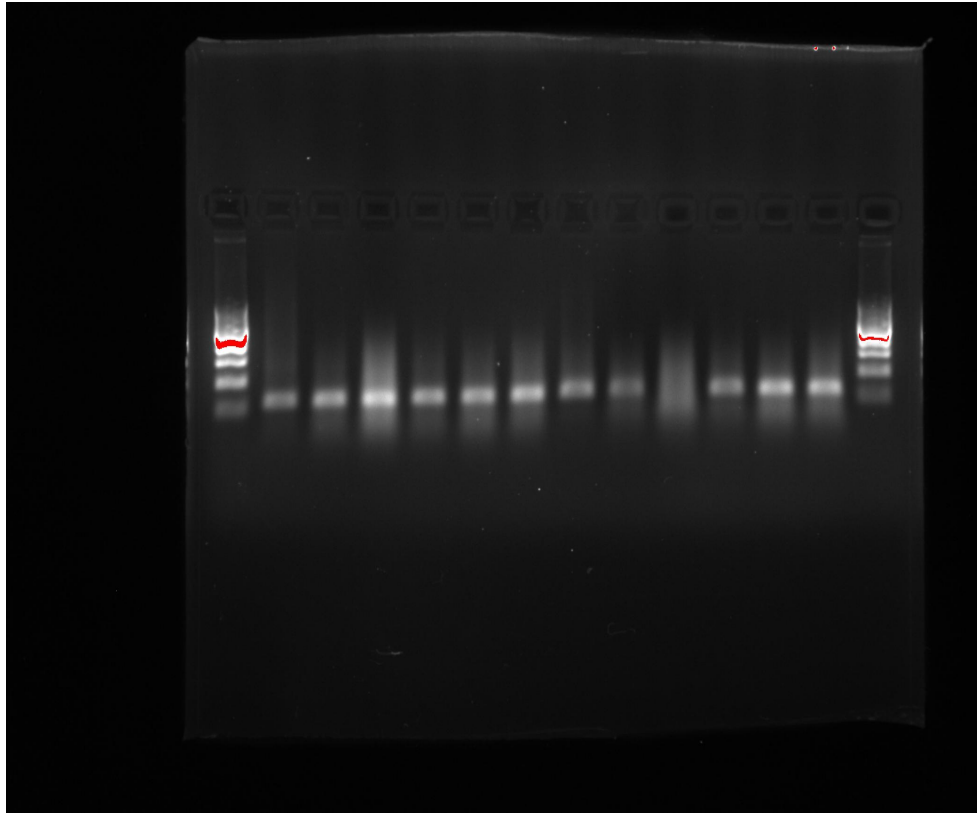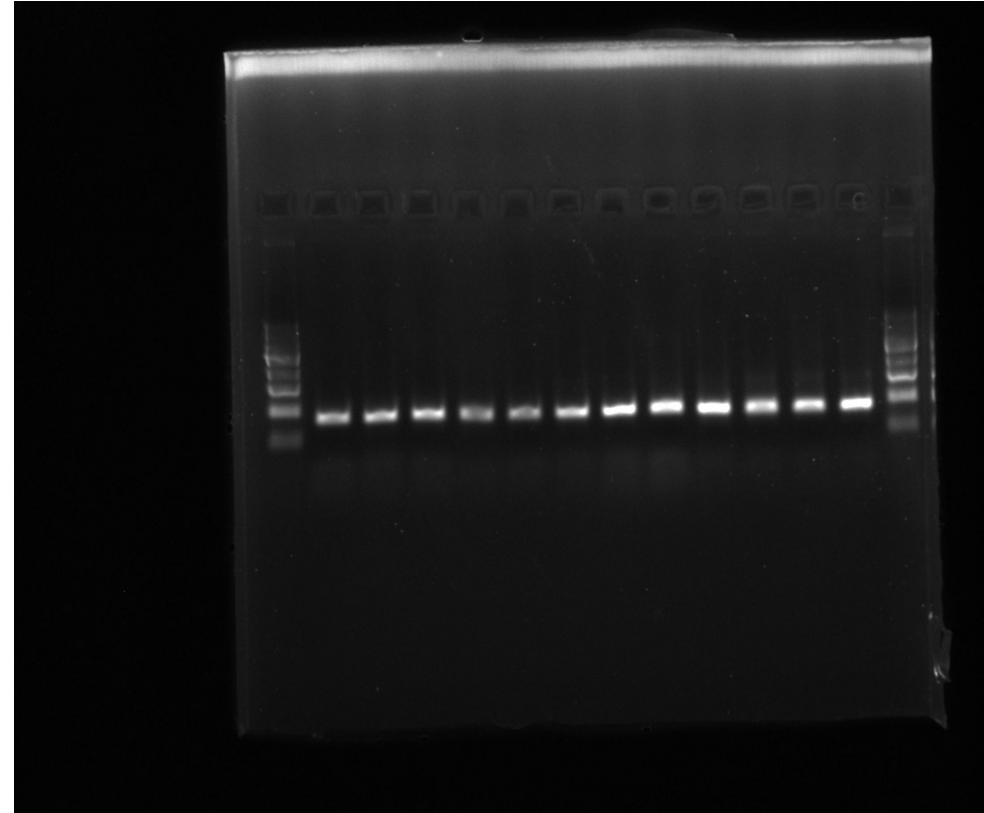

**Figure 3S(B)** | The expression of tRF-Leu-AAG-001 in normal endometrial tissues (a) and ectopic tissues (b).  
The expression of u6 (c).

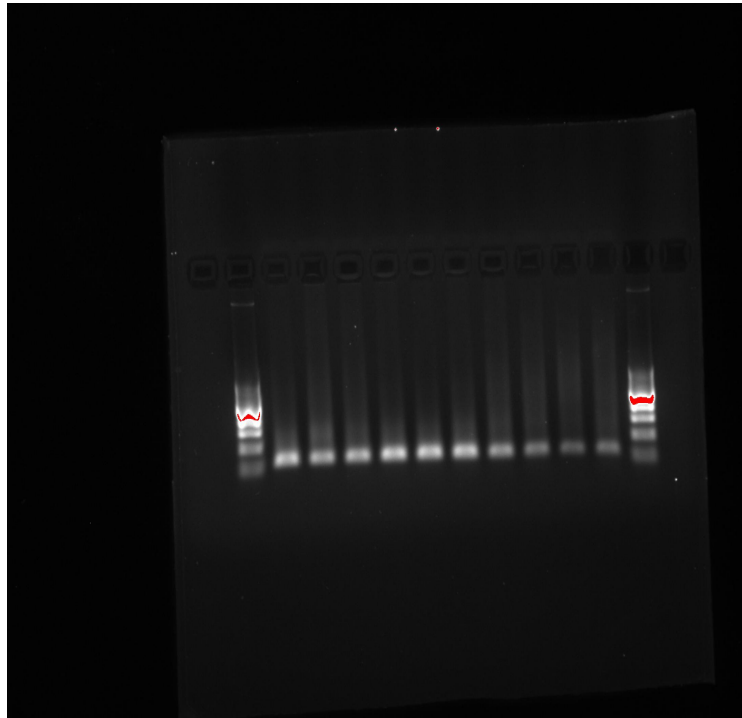

(a)

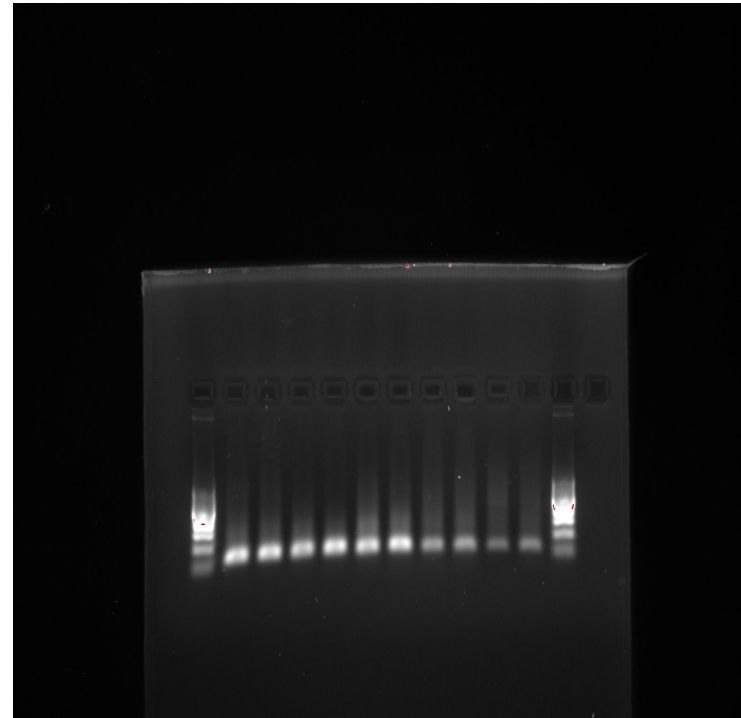

(b)

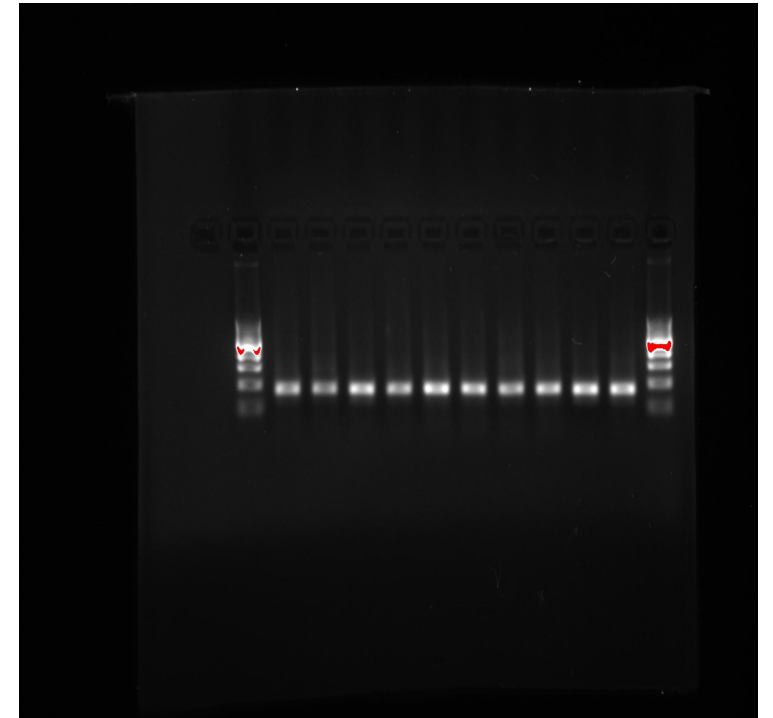

(c)

**Figure 4S(A)** | The expression of tRF-Leu-AAG-001 (left) and u6 (right) in two mast cell lines.

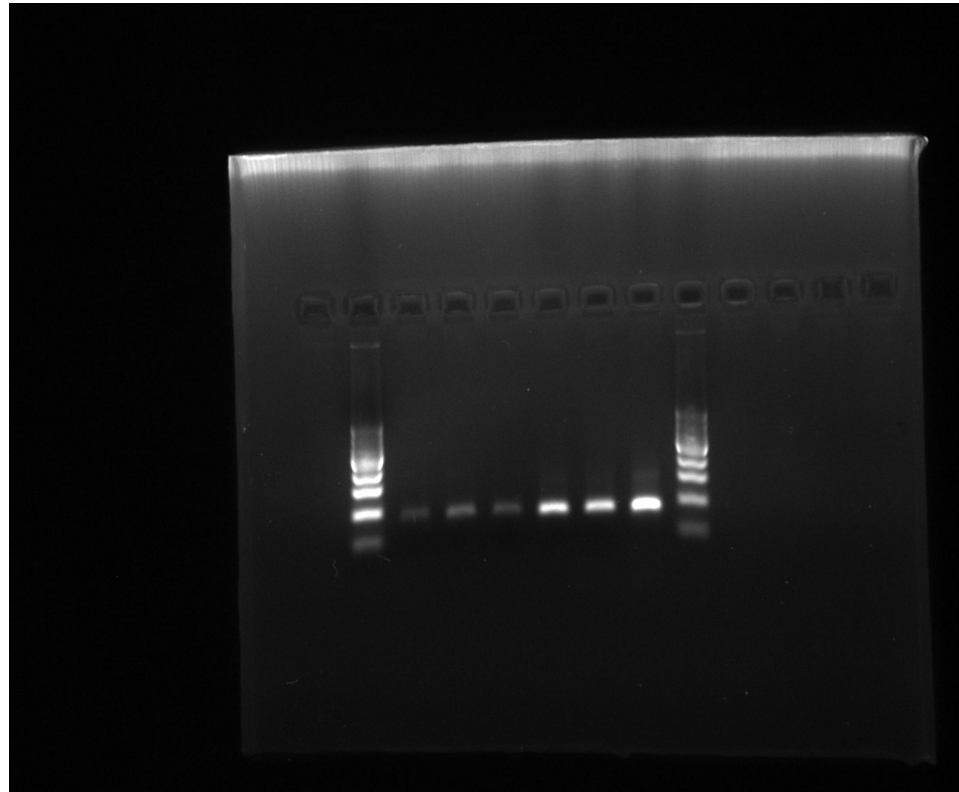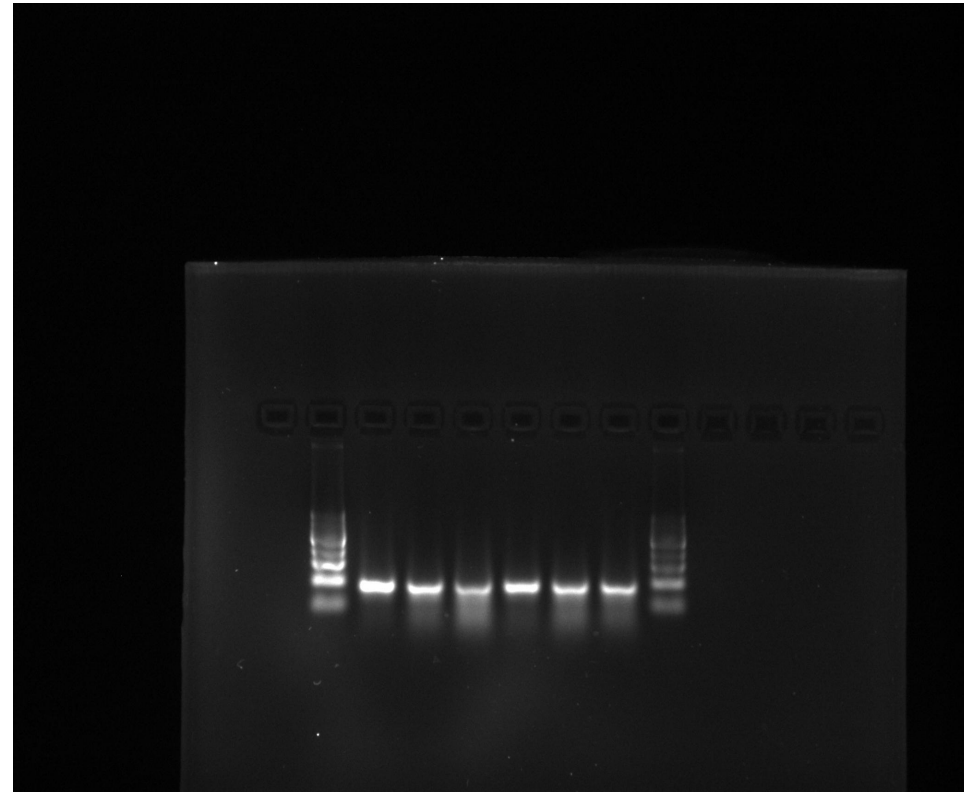

Supplement: 12905_2022_1827_MOESM4_ESM.pdf [file 12905_2022_1827_MOESM4_ESM.pdf]
