# Supplementary material for: Exosomal tRF-Leu-AAG-001 derived from mast cell as a potential non-invasive diagnostic biomarker for endometriosis
Source: PubMed Central journal article supplement (PMC9233364; doi:10.1186/s12905-022-01827-6), 2022-06-25

## HSP70

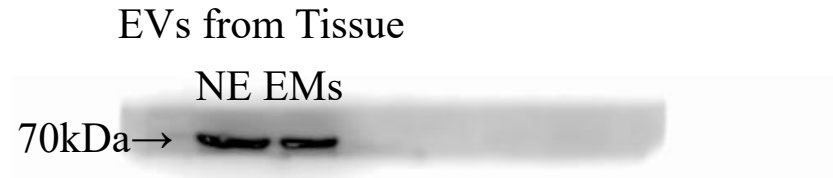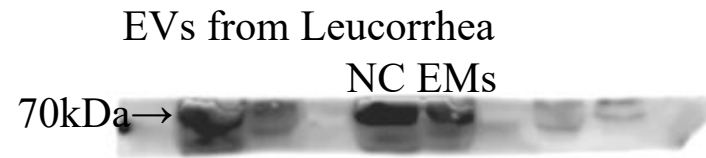

## Flotillin1

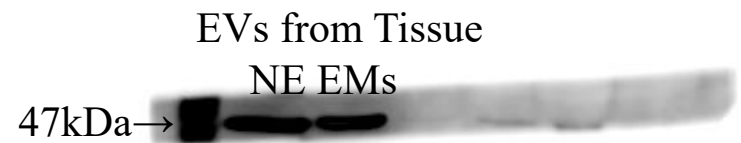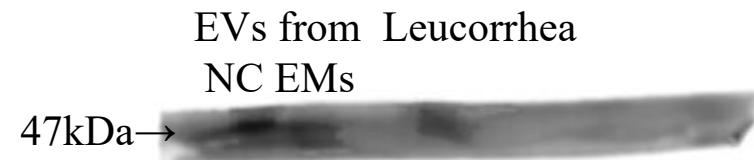

**CD63**

EVs from  
Tissue Leucorrhea  
NE EMs NC EMs

25kDa→

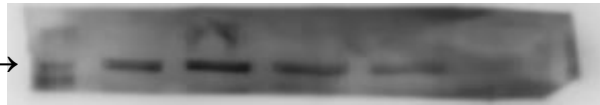

**Calnexin**

Cell EVs

75kDa→

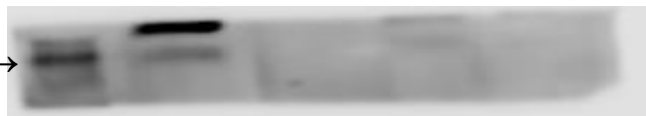

Supplement: 12905_2022_1827_MOESM3_ESM.pdf [file 12905_2022_1827_MOESM3_ESM.pdf]
